# Supplementary material for: Late Eocene to early Oligocene productivity events in the proto-Southern Ocean as drivers of global cooling and Antarctica glaciation
Source: Copernicus journal article supplement (doi:10.5194/egusphere-2023-1276), 2023-07-25
Supplement: Supplementary file 8 [file egusphere-2023-1276-supplement-version3.zip]

Supporting Information for

**Late Eocene to early Oligocene productivity events in the proto-Southern Ocean and correlation to climate change**

**Gabrielle R. de Faria<sup>1,2</sup>, David Lazarus<sup>1</sup>, Johan Renaudie<sup>1</sup>, Jessica Stammeier<sup>3</sup>, Volkan Özen<sup>1,2</sup> and Ulrich Struck<sup>1,2</sup>**

<sup>1</sup> Museum für Naturkunde, Leibniz Institute for Evolution and Biodiversity Science, Invalidenstraße 43, 10115, Berlin, Germany

<sup>2</sup> Freie Universität Berlin, Institute for Geological Sciences, Malteserstraße 74-100, 12249 Berlin, Germany

<sup>3</sup> GFZ German Research Centre for Geosciences, Telegrafenberg, 14473 Potsdam, Germany

**Contents of this file**

Figures S1 to S7

Tables S1 and S2

**Introduction**

This supplement includes the age models for ODP sites 1090, 748, 689 (Figures S1 to S3), as well as for ODP Site 738 (Figure S4) as we compare our results to published data from this site, and the age model(s) are relevant to our interpretations. It also includes sedimentation rates compared to biogenic barium accumulation rates (Figure S5). Tables S1 and S2 show the data included in our compilation of Neodymium isotopes and atmospheric carbon dioxide.

## Figures S1 to S4

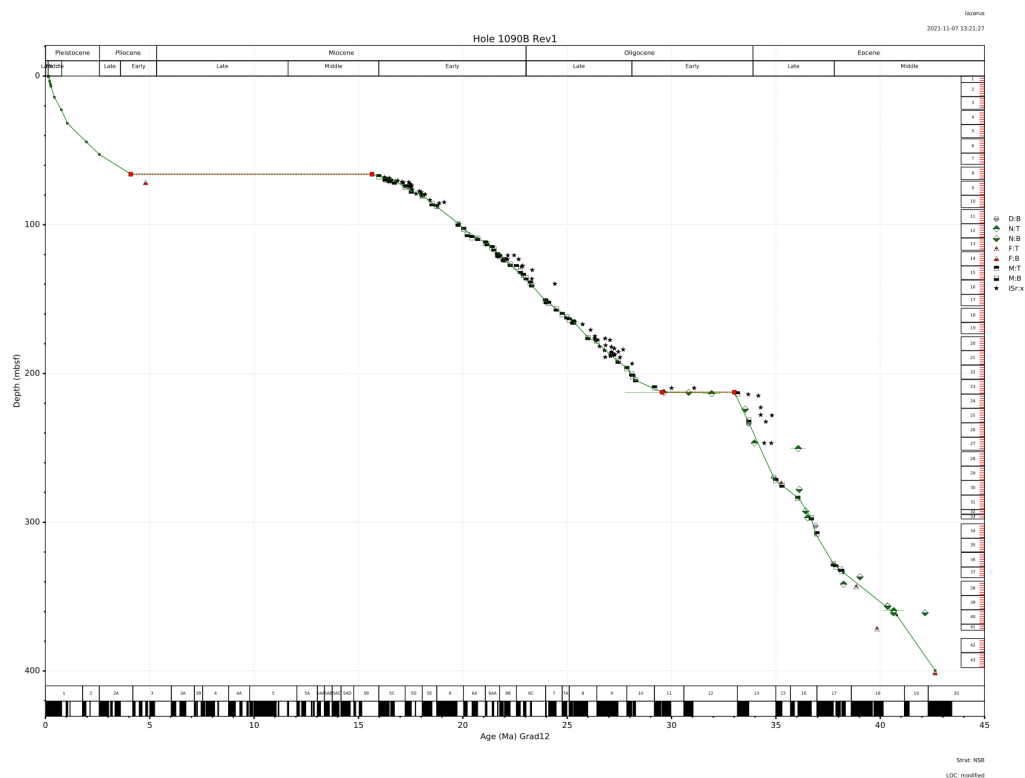

**Figure S1. Age depth plot, ODP Site 1090.** This site benefits from a robust paleomagnetic stratigraphy supported by coherent multiple fossil group biostratigraphy, and in the late Eocene - Oligocene strontium isotope stratigraphy. Sources of geochronologic data and interpretations are given in detail in Channell et al. (2003). D - diatom, F - planktonic foraminifera, I - isotope (Strontium, Oxygen event, etc.), M - paleomagnetic stratigraphy reversal boundary pick, N - calcareous nannofossil, R - radiolaria; B - bottom, T - top. Other plotting conventions for these and other age depth plots in this SOM are given in the description of the plotting program ADP (Renaudie et al., 2020) and the companion user guide to the program ([https://github.com/plannapus/nsb\\_adp\\_wx/releases](https://github.com/plannapus/nsb_adp_wx/releases)). All age models, and the data used to create them, are available at the NSB web-site (<https://nsb.mfn-berlin.de>)

a)

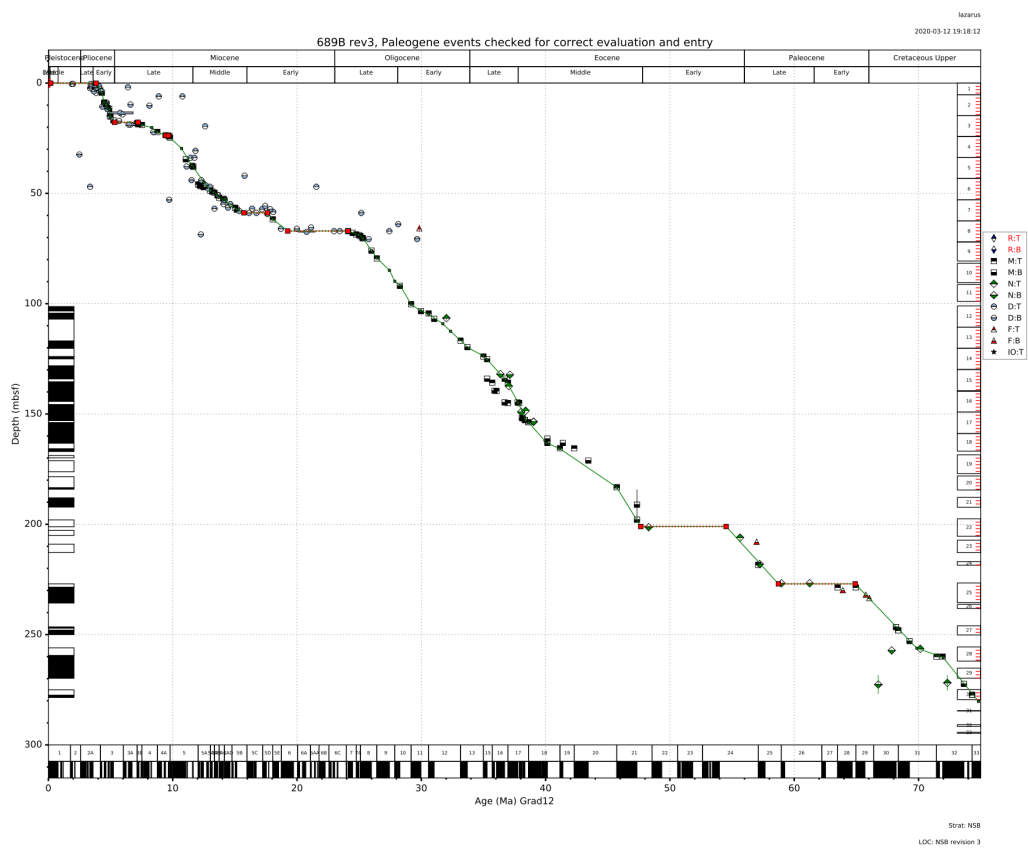

b)

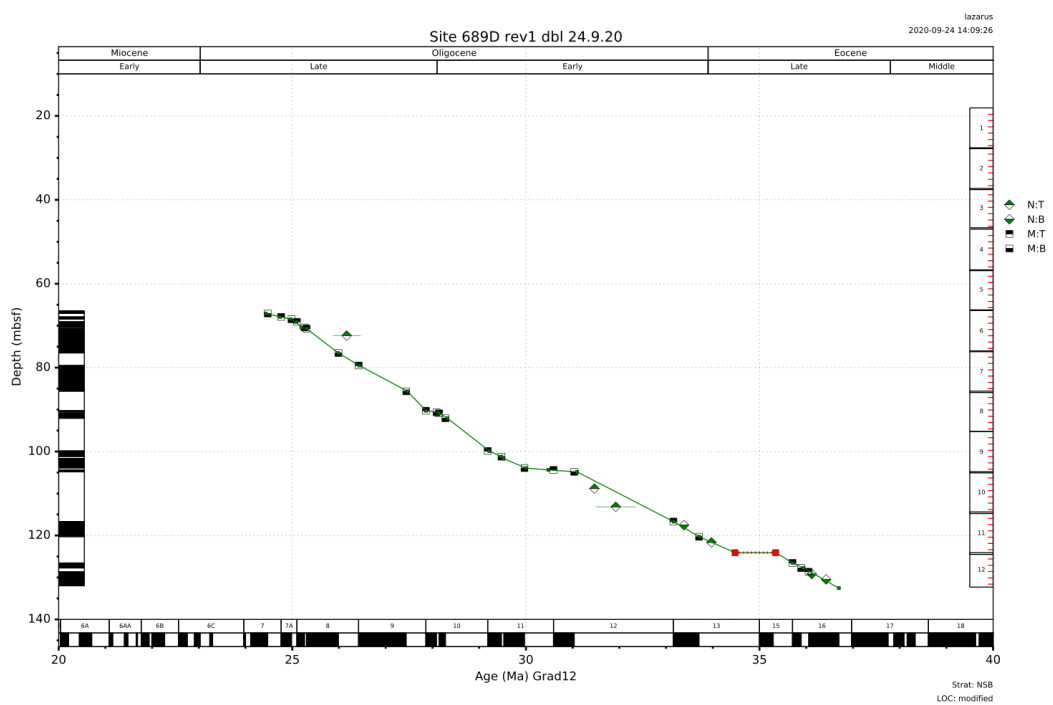

c)

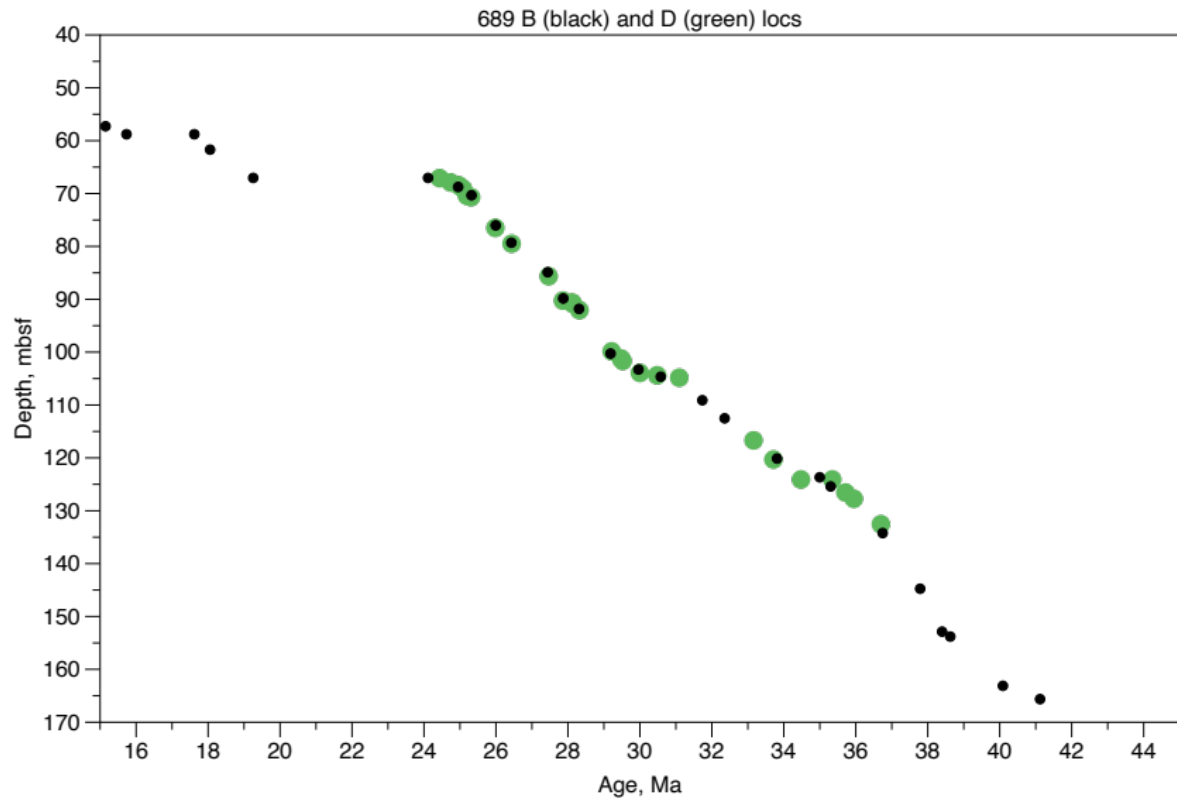

**Figure S2 a-c Southern Ocean, Maud Rise ODP Site 689, holes B (top) and D (bottom) age-depth plots, and a cross-plot showing coherency between holes. This site has had multiple rounds of stratigraphic study and revision. The original paleomagnetic stratigraphy interpretation of Spiess (Leg volume Science Report) for Hole B was re-evaluated and questionable magnetic data removed from the polarity interpretation (shown along the depth axis on left). Polarity intervals based on single samples were removed, and intervals of more than a couple meters with no measurements were shown as no data rather than as a continuous polarity interval. Florindo et al. (2005) created new data for Hole D and cross-compared the holes at selected intervals. This evaluation was used and extended to other depth intervals here, and as a result some polarity reversal boundaries were re- assigned to a different GPTS boundary. Both the older and new picks are shown on the plot for Hole 689B. As noted by Florindo et al.(2005) paleomagnetic stratigraphy at this site becomes unreliable below about 38 Ma.**

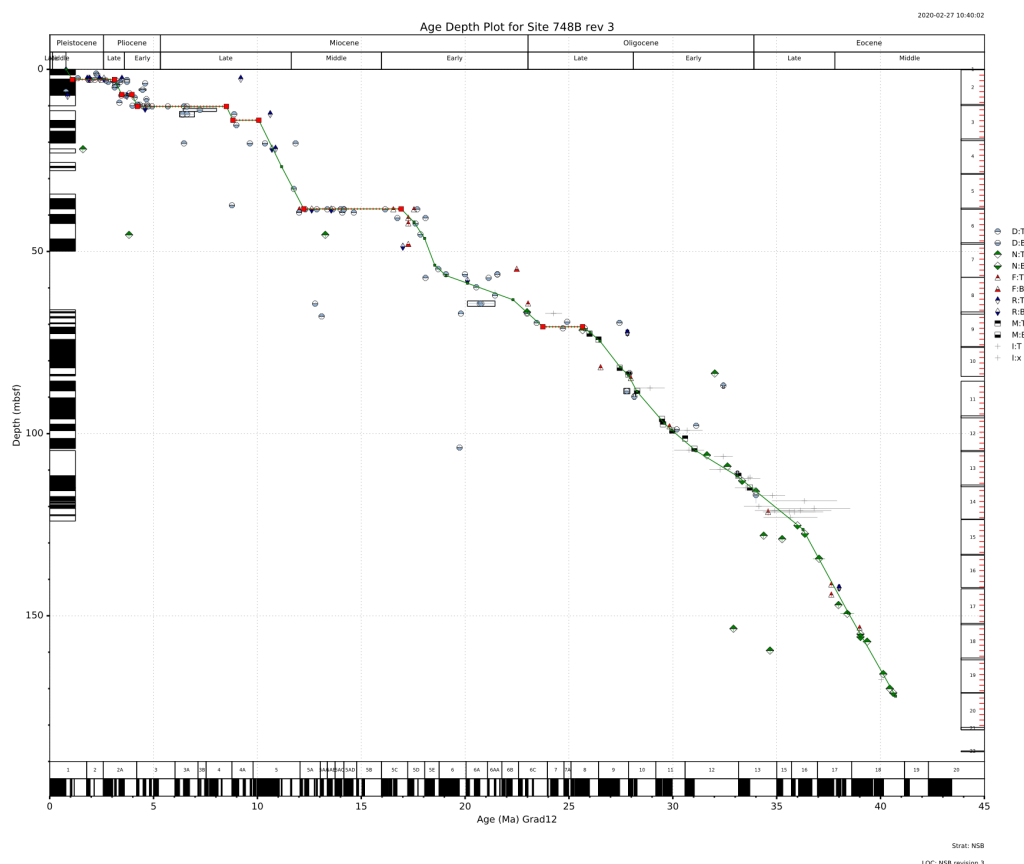

**Figure S3: Southern Ocean, Kerguelen Plateau, ODP Site 748, hole B, age-depth plot. The Paleogene part of this Site was restudied, diatom events were recalibrated, strontium isotope data were generated and a new paleomagnetic stratigraphy was developed by Roberts et al (2003). Their interpretation is followed here. The Neogene has not yet been similarly revised.**

a)

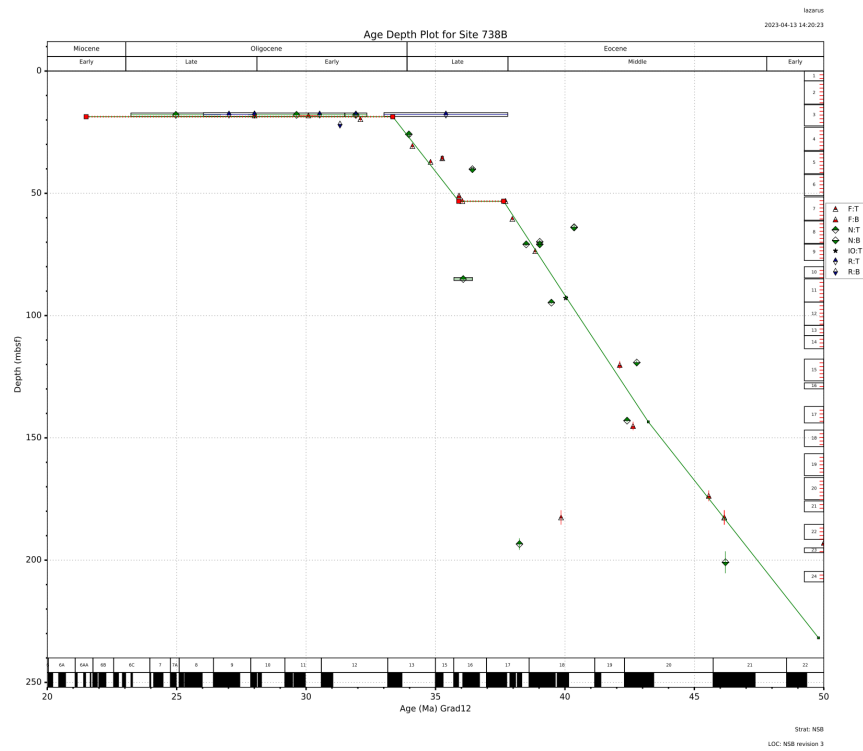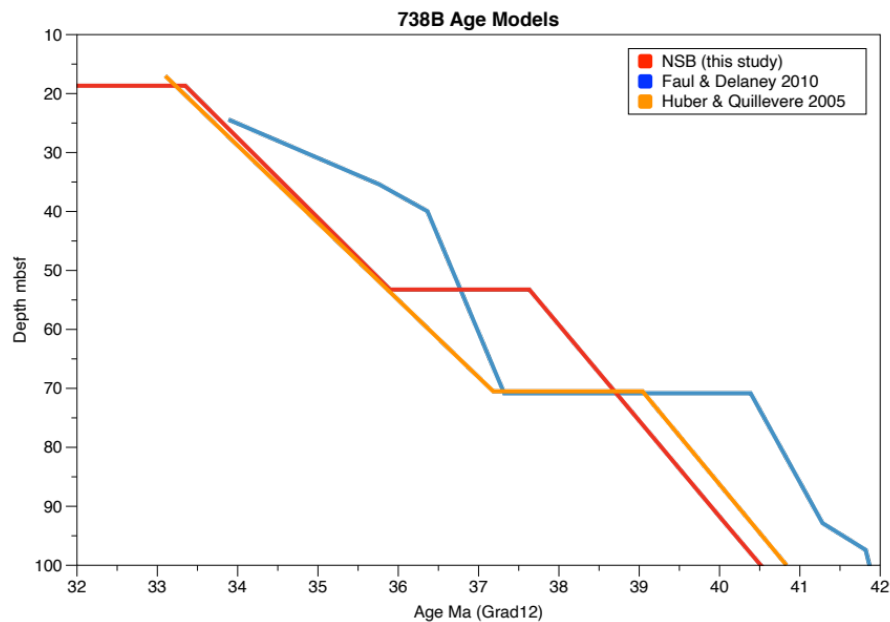

b)

**Figure S4a-b: Southern Ocean, Kerguelen Plateau, ODP Site 738, hole B, age-depth plot, and alternative age models from the recent literature. Although there have been several studies and revisions of chronostratigraphic information for the older Paleogene part of this site (below ca 40 Ma) the late Eocene interval remains problematic and dif-**

ferent interpretations are possible. Here we show, in addition to that used in our study, those of Huber and Quillevère (2005) and Faul and Delaney (2010). Differences in ages and sedimentation rates are substantial and thus productivity proxies based on accumulation rate are uncertain for the late Eocene interval of this site.

a)

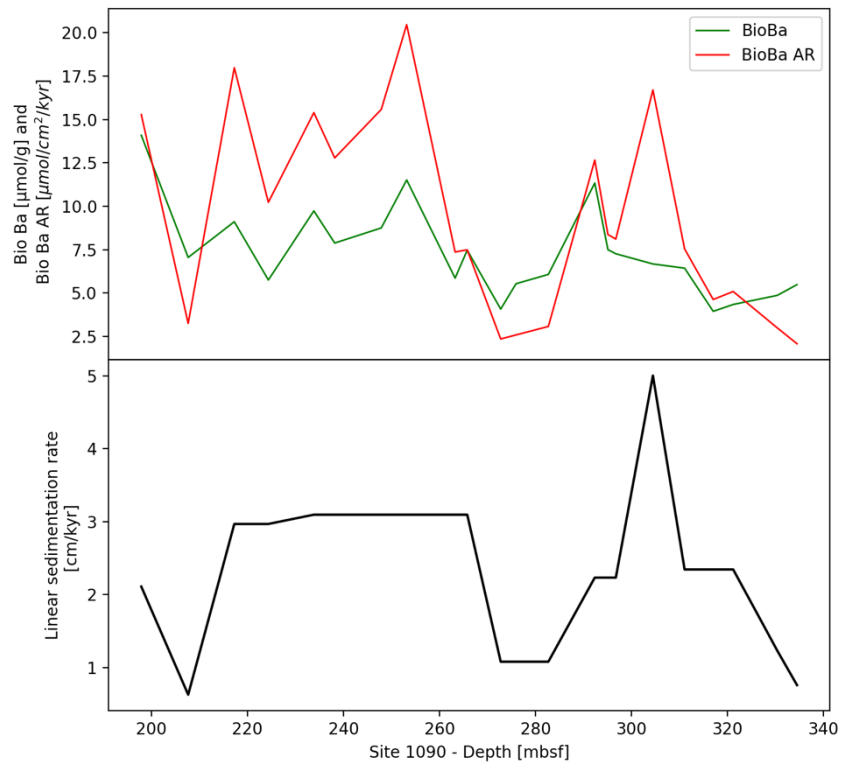

b)

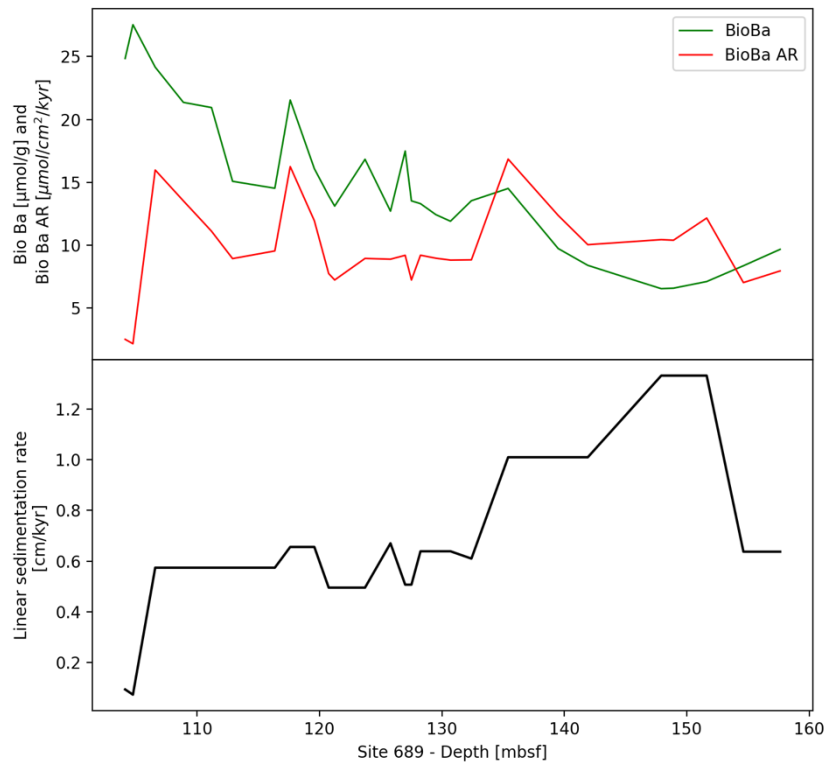

c)

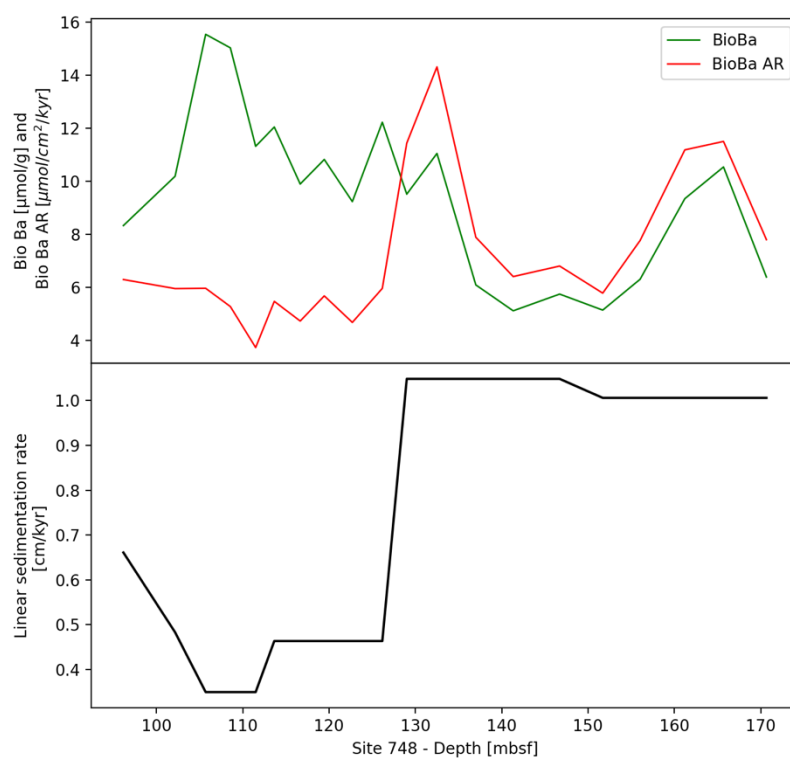

**Figure S5: Biogenic barium accumulation rates, Bio Ba AR and sedimentation rate ODP Site 1090(a), ODP Site 689 (b), ODP Site 748 (c).**



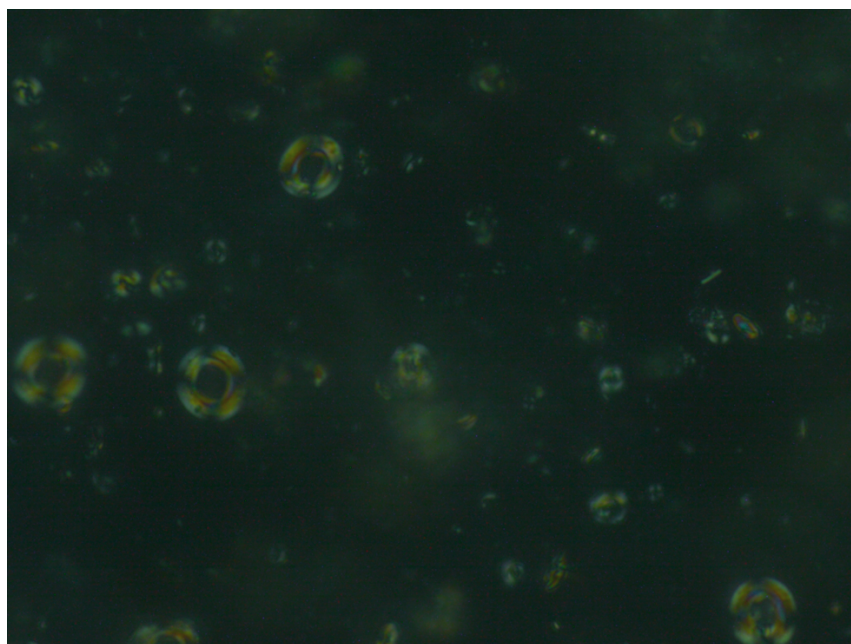

**Figure S6: Polarised Microscope image from fine fraction sediments (<45µm) - coccoliths.**

## Atmospheric $p\text{CO}_2$ data

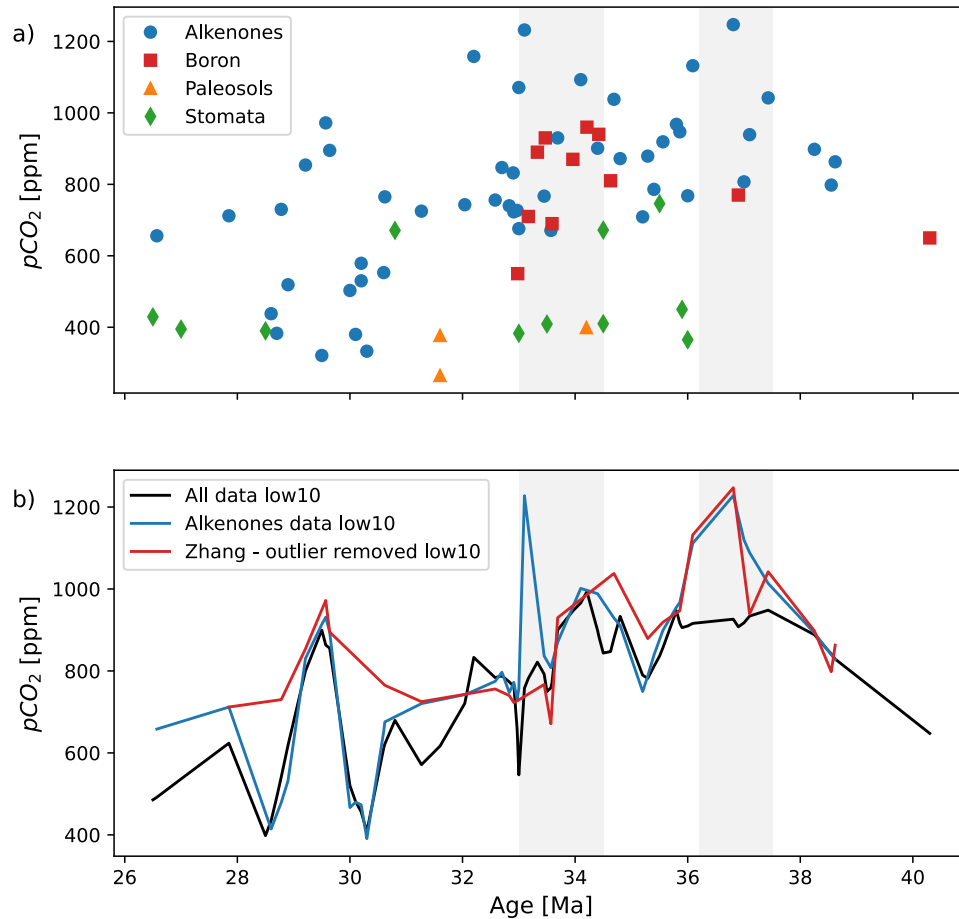

**Figure S7: Compilation of paleo atmospheric  $p\text{CO}_2$  reconstructions. a) data from marine and terrestrial archives. b) Lowess fitted smoothed curves to various compilations of proxy  $p\text{CO}_2$  data: Black - all proxy data, including also Boron, paleosol and stomata estimates. Blue - all data from a single proxy (alkenones). Red - Single site alkenone proxy data from Zhang, with single outlier ( $>> 2,000$  ppm) removed - same time series as in main text Figure 4.**

**Data sources given in Table S2. Other than a single outlier point (all alkenone curve, ca 33.1 Ma), Alkenone curves show coherent pattern of maximum values near 37 Ma, followed by declining values until ca 35 Ma, a smaller peak at ca 34.5, and a rapid decline at ca 34 Ma. Data younger than ca 32 Ma is relatively sparse and different data subsets do not show the same degree of coherency, although all agree on eventual decline to values near 40 ppm by ca 25 Ma.**

**Table S1.** Neodymium isotopes data compilation from fossil fish teeth from the locations investigated in this study.

| <b>Sites</b> | <b>Hole</b> | <b>Location</b>                     | <b>Reference</b>         |
|--------------|-------------|-------------------------------------|--------------------------|
| 1090         | B           | Agulhas Ridge, South Atlantic Ocean | Scher and Martin [2006]  |
| 689          | B           | Maud Rise, Southern Ocean           | Scher and Martin [2004]  |
| 738          | B           | Kerguelen Plateau, Indian Ocean     | Scher and Delaney [2010] |
| 738          | B           | Kerguelen Plateau, Indian Ocean     | Scher et al. [2011]      |
| 738          | B           | Kerguelen Plateau, Indian Ocean     | Scher et al. [2014]      |
| 748          | B           | Kerguelen Plateau, Indian Ocean     | Wright et al. [2018]     |
| 744          | A           | Kerguelen Plateau, Indian Ocean     | Wright et al. [2018]     |

**Table S2.** *p*CO<sub>2</sub> data compilation

| Reference                                                                               | Method         | Sites                                                                | Location                                 |
|-----------------------------------------------------------------------------------------|----------------|----------------------------------------------------------------------|------------------------------------------|
| Pagani et al. 2005<br>(and 1999a, 1999b<br>updated by<br>Henderiks and<br>Pagani 2008). | Alkenones      | DSDP <sup>b</sup> Sites 511,<br>513, 516 and 612<br><br>ODP Site 803 | Atlantic Ocean<br><br>Equatorial Pacific |
| Zhang et al. [2013]                                                                     | Alkenones      | ODP <sup>a</sup> Site 925 A                                          | Western equatorial Atlantic Ocean        |
| Anagnostou et al.<br>[2016]                                                             | Boron isotopes | TDP 12 e 13                                                          | Tanzania                                 |
| Anagnostou et al.<br>[2020]                                                             | Boron isotopes | ODP Site 865                                                         | Equatorial Pacific                       |
| Henehan et al.<br>[2020]                                                                | Boron isotopes | ODP Site 1260<br>ODP Site 865                                        | Equatorial Atlantic Equatorial Pacific   |
| Pearson et al.<br>[2009] (updated by<br>Anagnostou et al.<br>2016)                      | Boron isotopes | TDP <sup>c</sup> 12 e 13                                             | Tanzania                                 |
| Breecker and<br>Retallack, [2014]                                                       | Paleosols      |                                                                      |                                          |
| Ekart et al. [1999]                                                                     | Paleosols      |                                                                      |                                          |
| Kohn et al. [2015]                                                                      | Paleosols      |                                                                      |                                          |
| Srivastava et al.<br>[2013]                                                             | Paleosols      |                                                                      |                                          |
| Doria et al. [2011]                                                                     | Stomata        |                                                                      |                                          |
| Erdei et al. [2012]                                                                     | Stomata        |                                                                      |                                          |
| Grein et al. [2013]<br>(updates Roth-<br>Nebelsick et<br>al.2004, 2012)                 | Stomata        |                                                                      |                                          |
| Kürschner et al.<br>[2008]                                                              | Stomata        |                                                                      |                                          |
| Reichgelt et al.<br>[2016]                                                              | Stomata        |                                                                      |                                          |
| Retallack [2009]                                                                        | Stomata        |                                                                      |                                          |
| Roth-Nebelsick et<br>al. [2012, 2014]                                                   | Stomata        |                                                                      |                                          |
| Steinthorsdottir et<br>al. [2016]                                                       | Stomata        |                                                                      |                                          |
| Sun et al. [2017]                                                                       | Stomata        |                                                                      |                                          |

**Note:** <sup>a</sup> Ocean Drilling Program; <sup>b</sup>Tanzanian Drilling Project
