# Supplementary figures and images for: Late Eocene to early Oligocene productivity events in the proto-Southern Ocean as drivers of global cooling and Antarctica glaciation
Source: Copernicus journal article supplement (doi:10.5194/egusphere-2023-1276), 2023-07-25

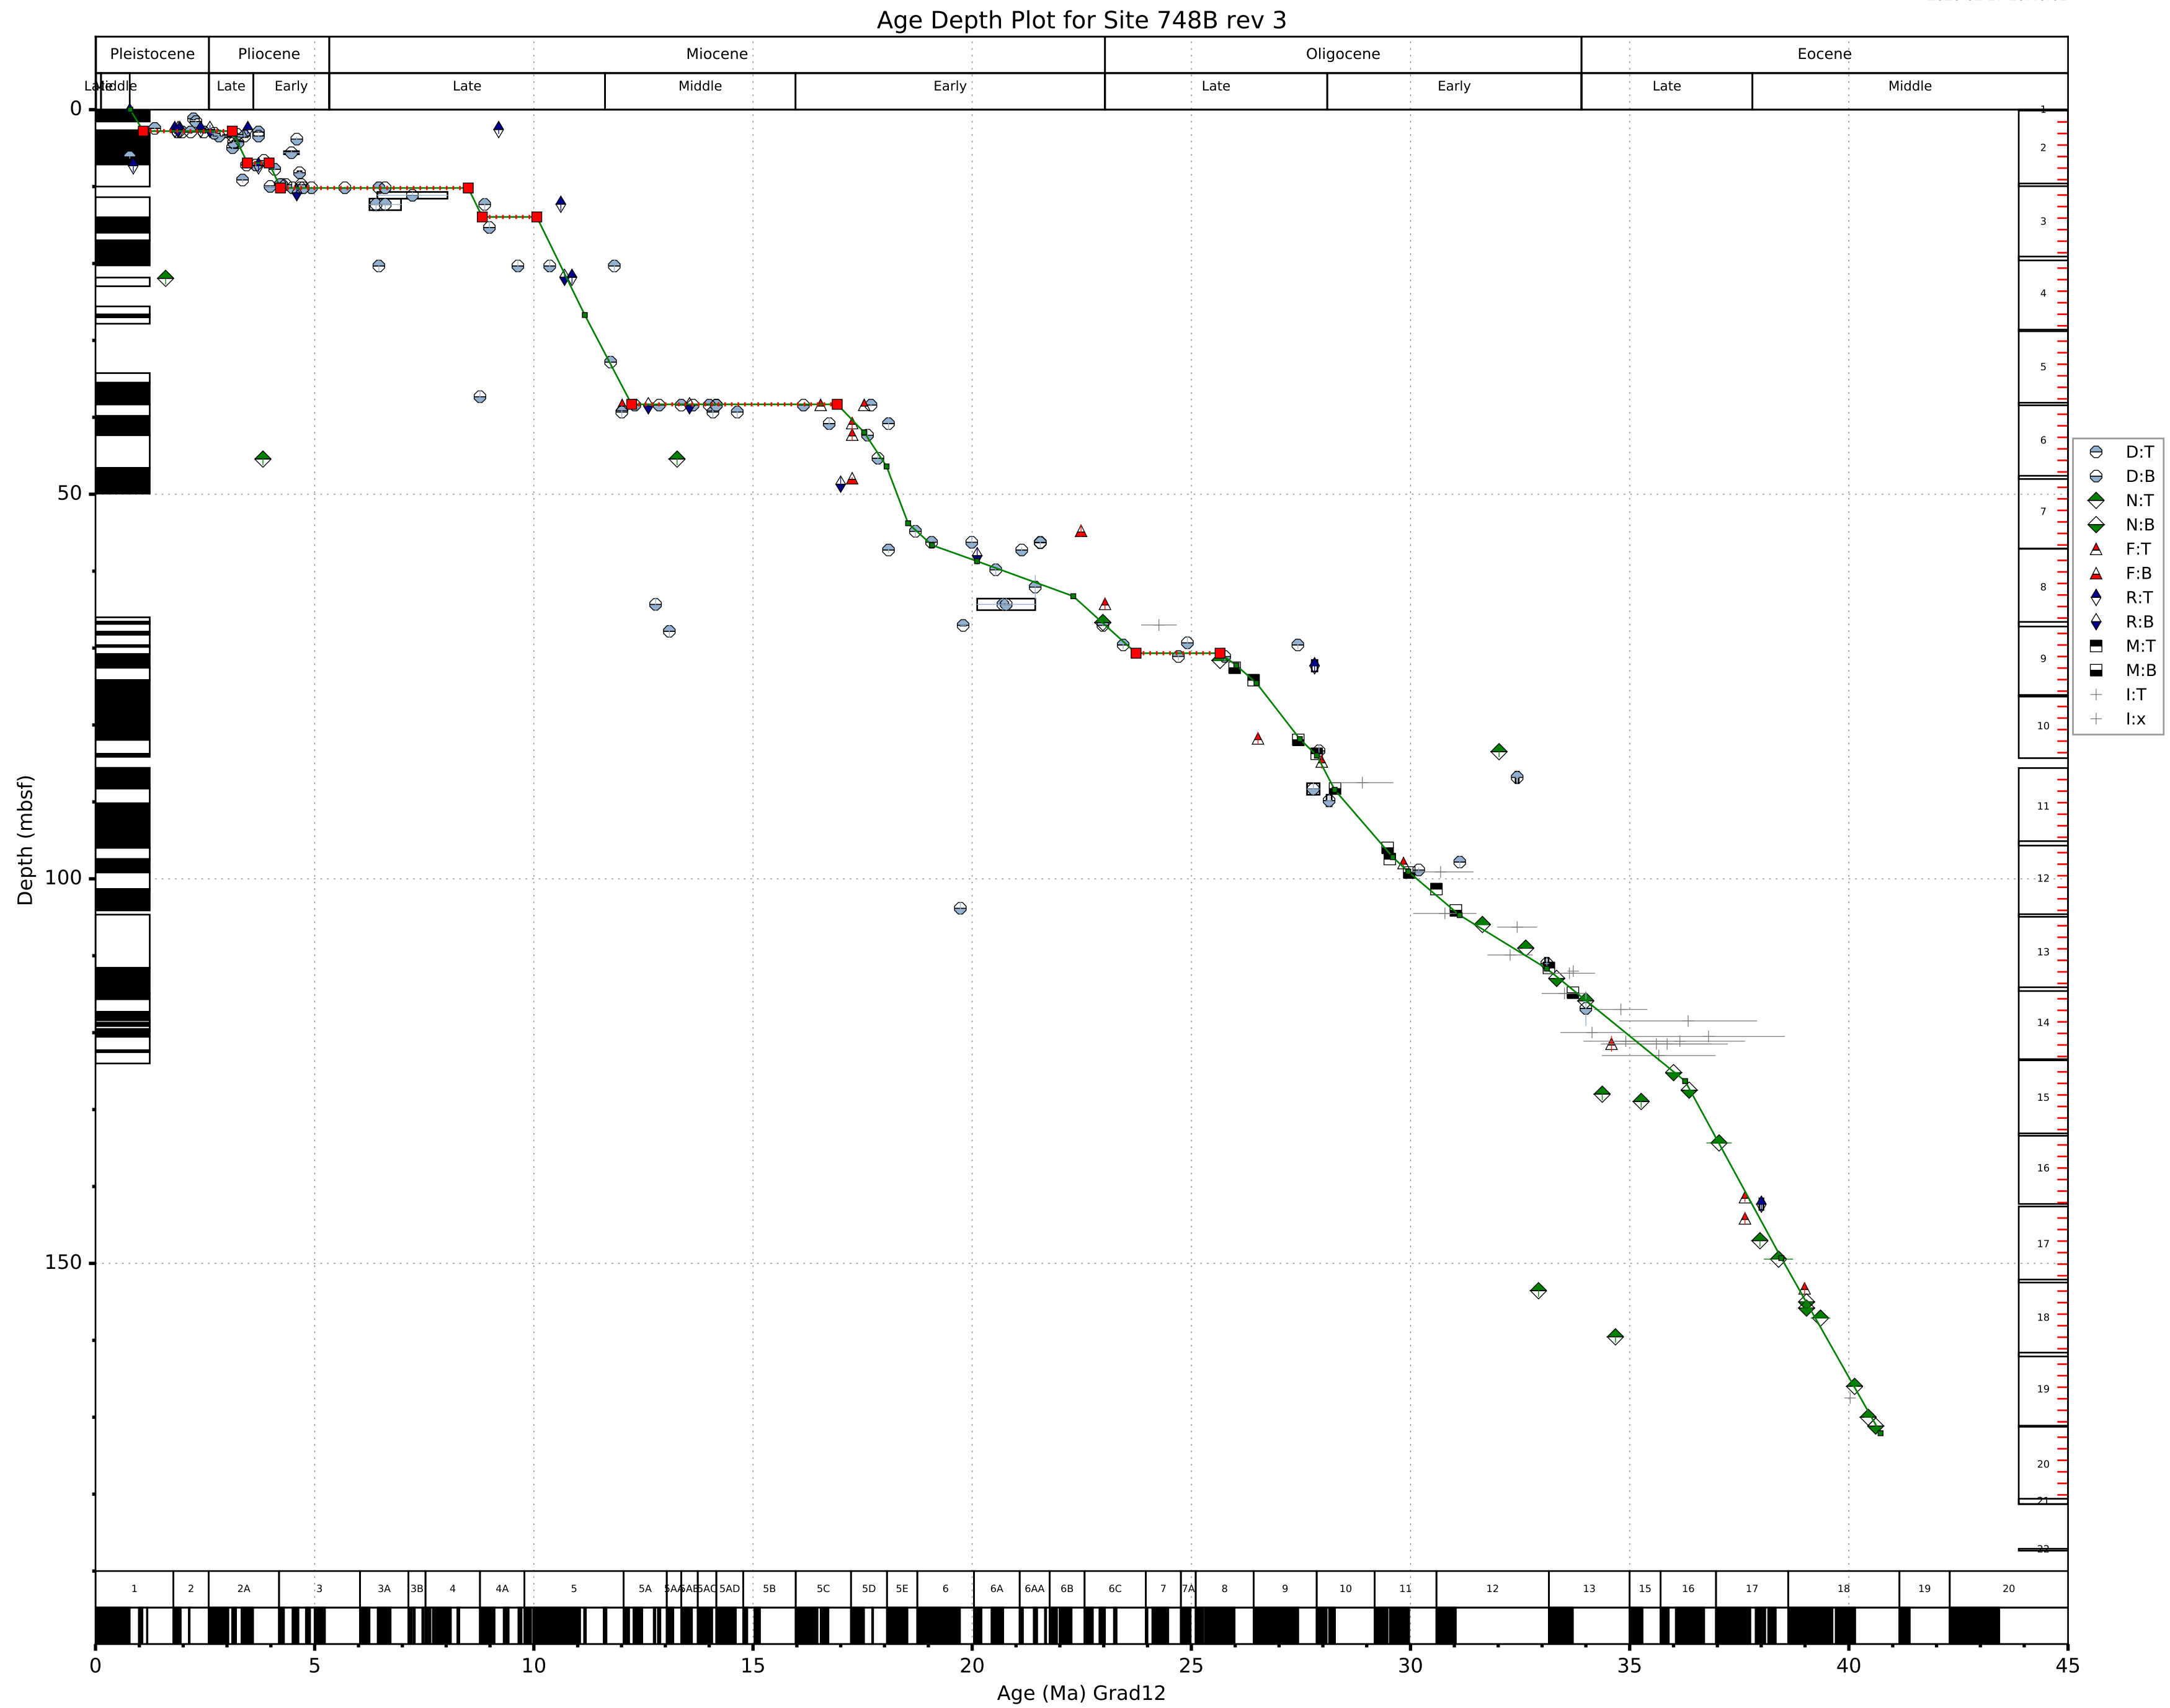

Supplement: Supplementary file 3 [file egusphere-2023-1276-supplement-version3.zip]

# Age Depth Plot for Site 689B

lazarus  
2019-09-25 14:14:46

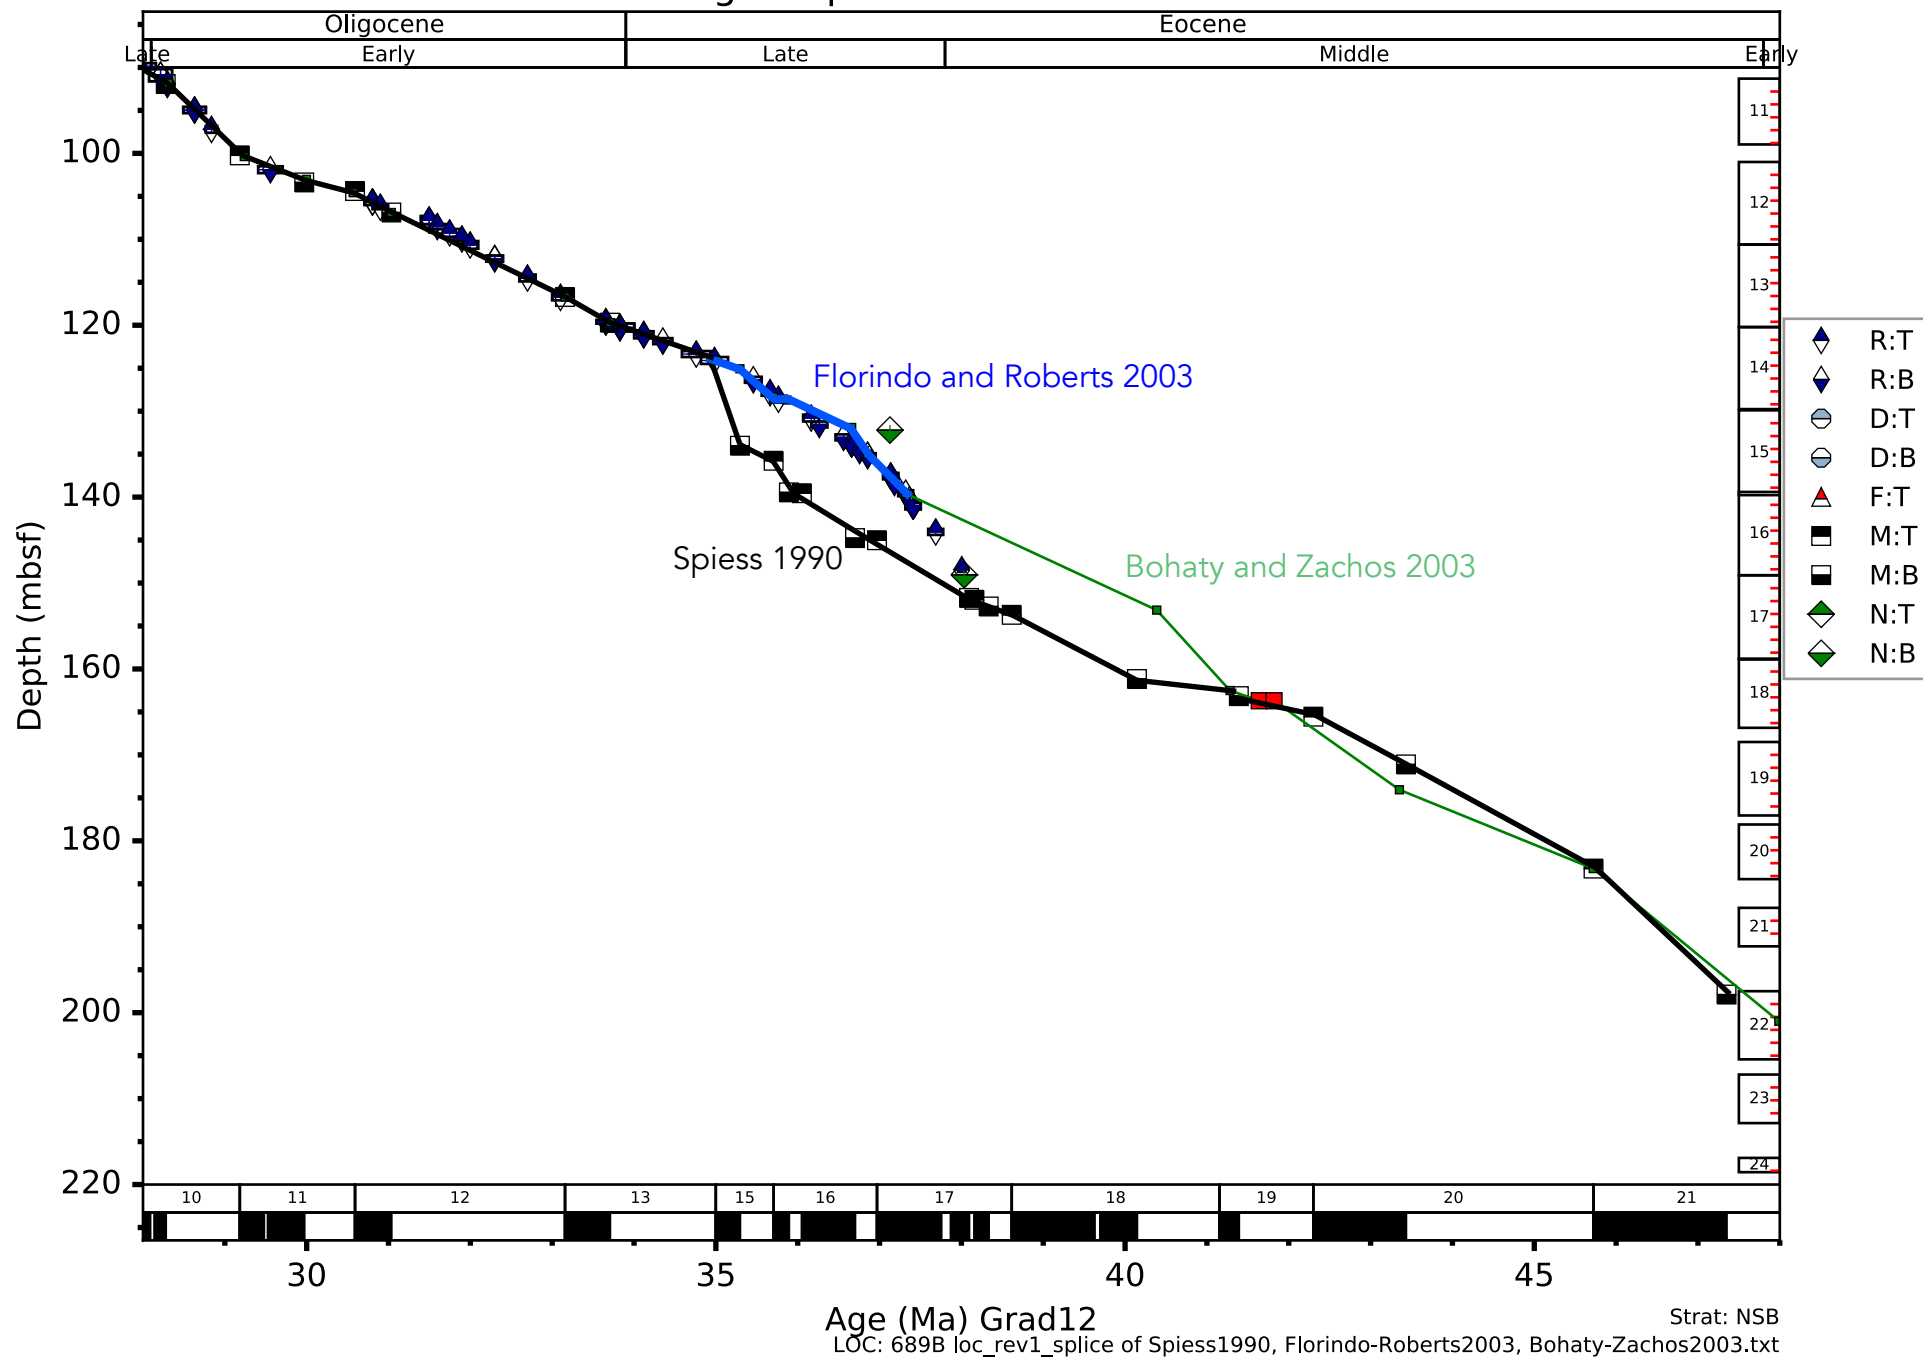

Supplement: Supplementary file 5 [file egusphere-2023-1276-supplement-version3.zip]

689B rev3, Paleogene events checked for correct evaluation and entry

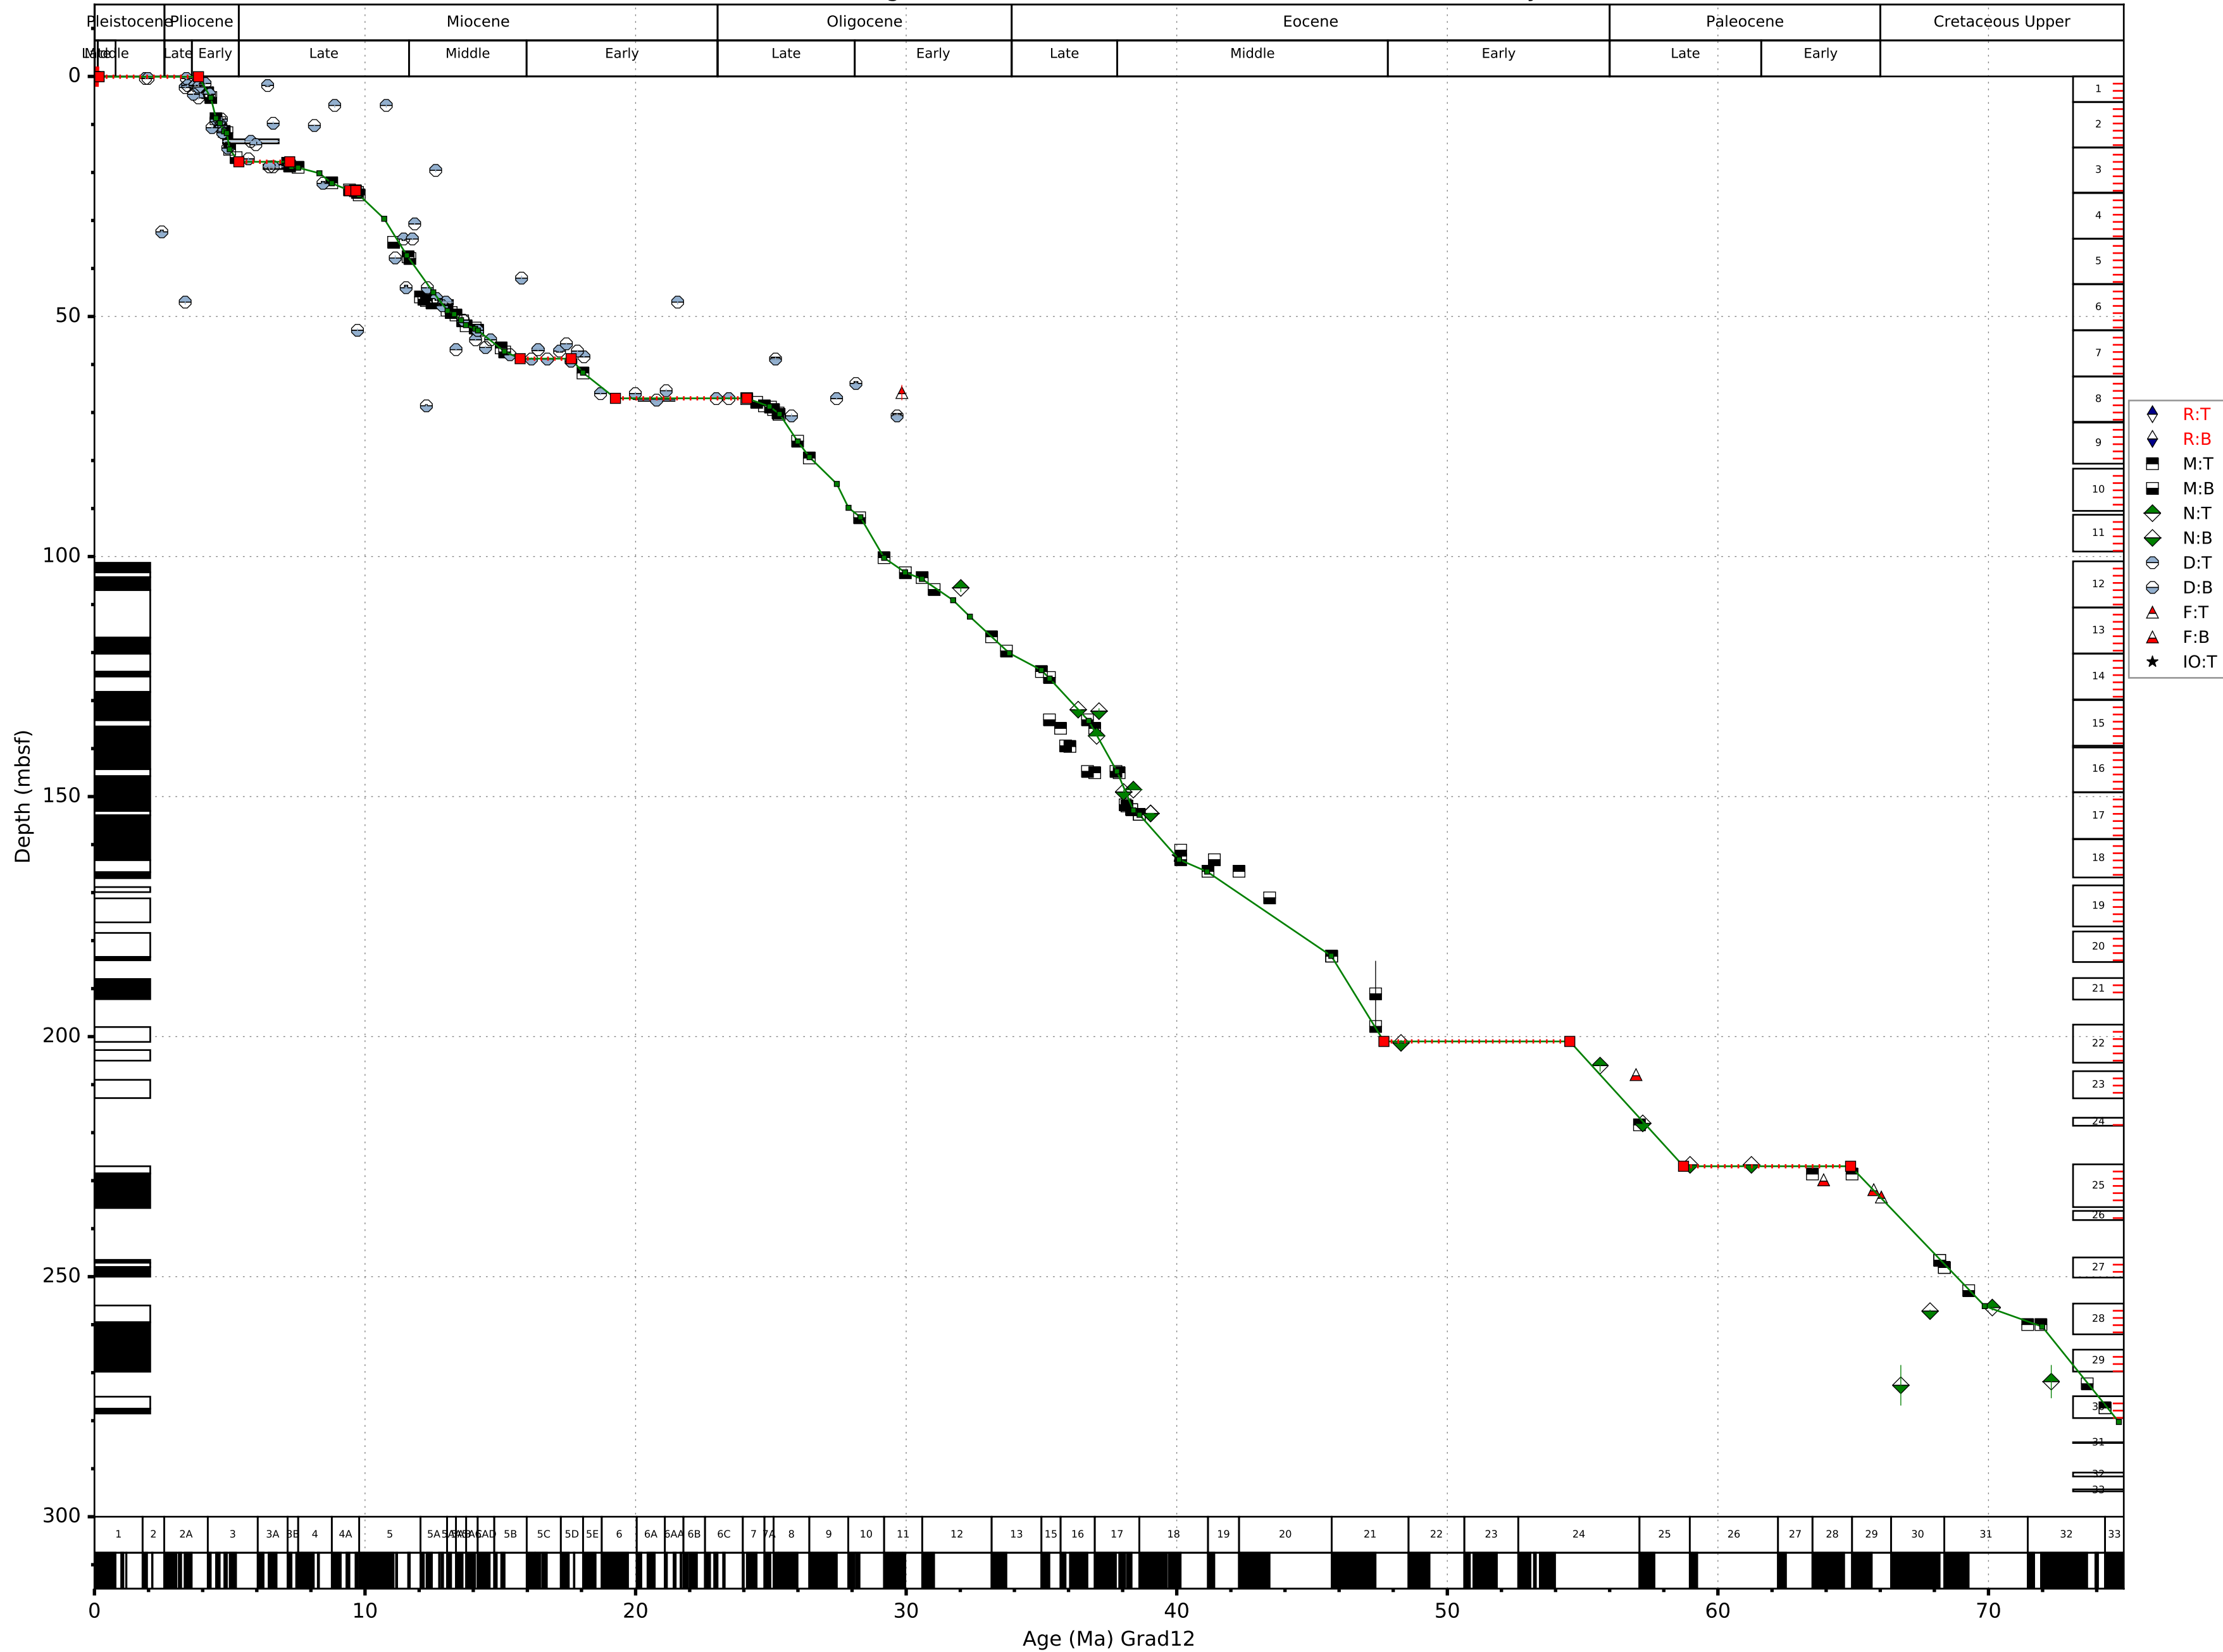

Supplement: Supplementary file 6 [file egusphere-2023-1276-supplement-version3.zip]

Site 1090B Rev2 13.1.2022

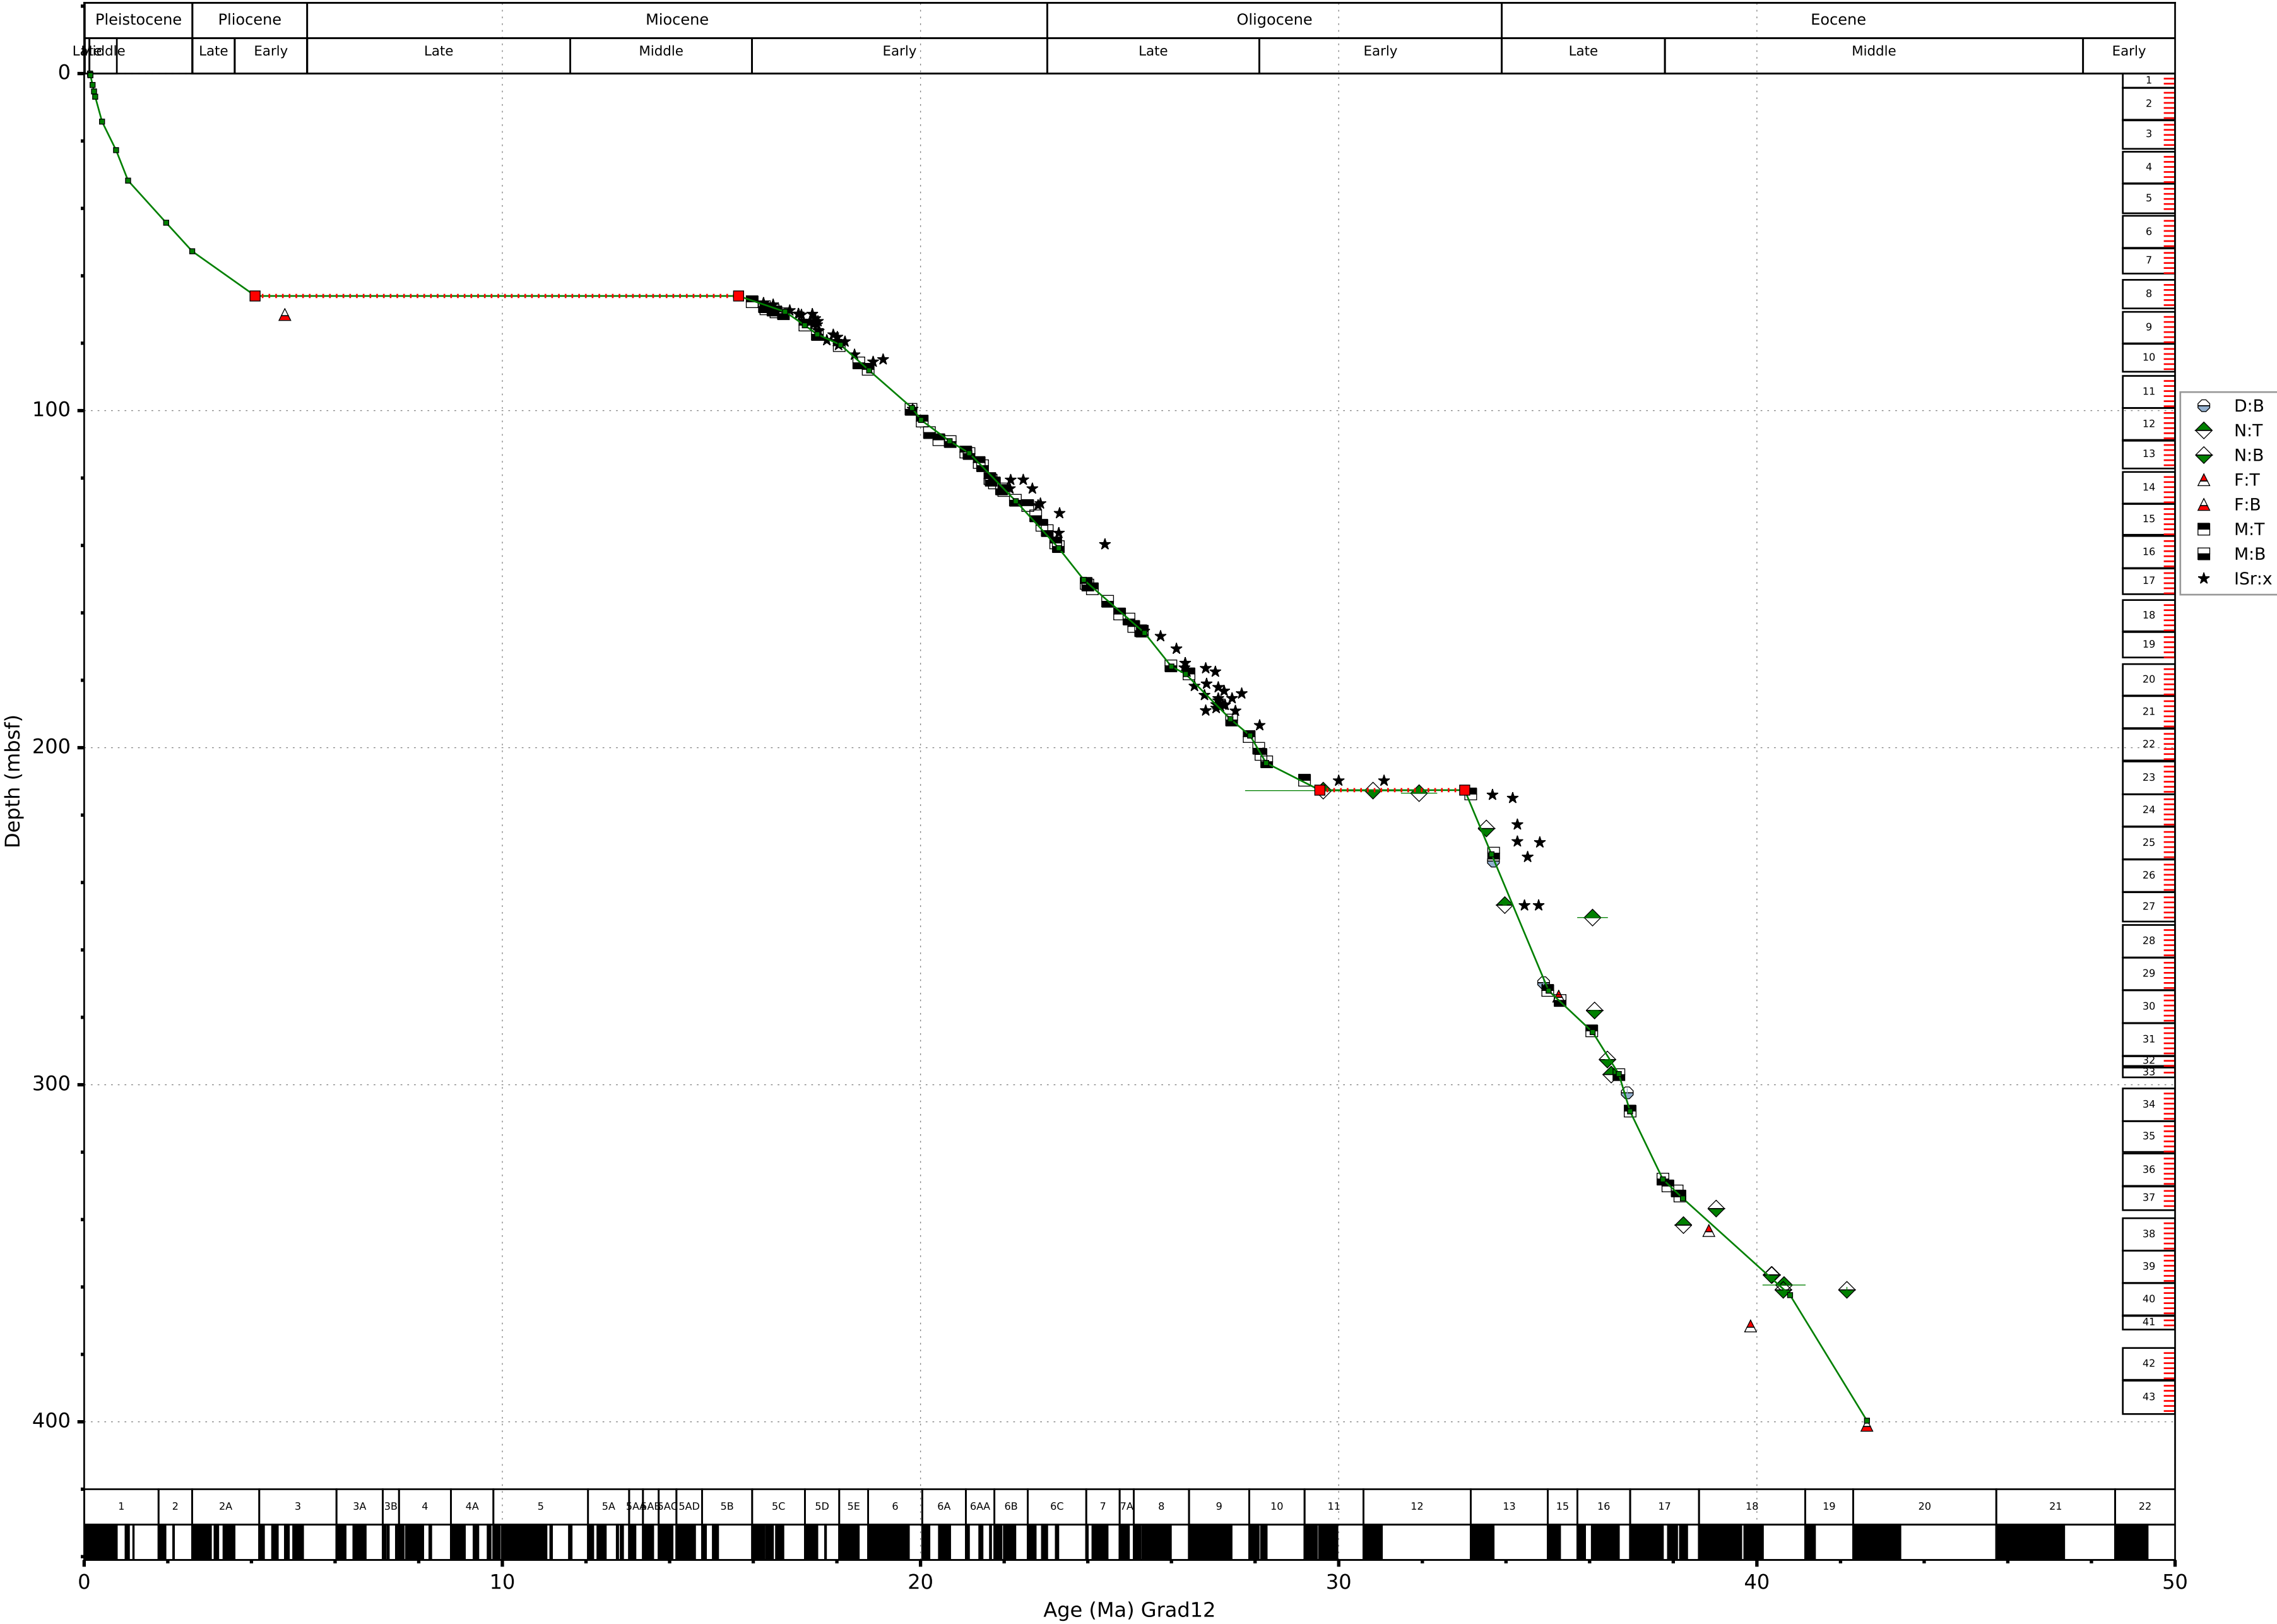

Supplement: Supplementary file 10 [file egusphere-2023-1276-supplement-version3.zip]

689 B (black) and D (green) locs

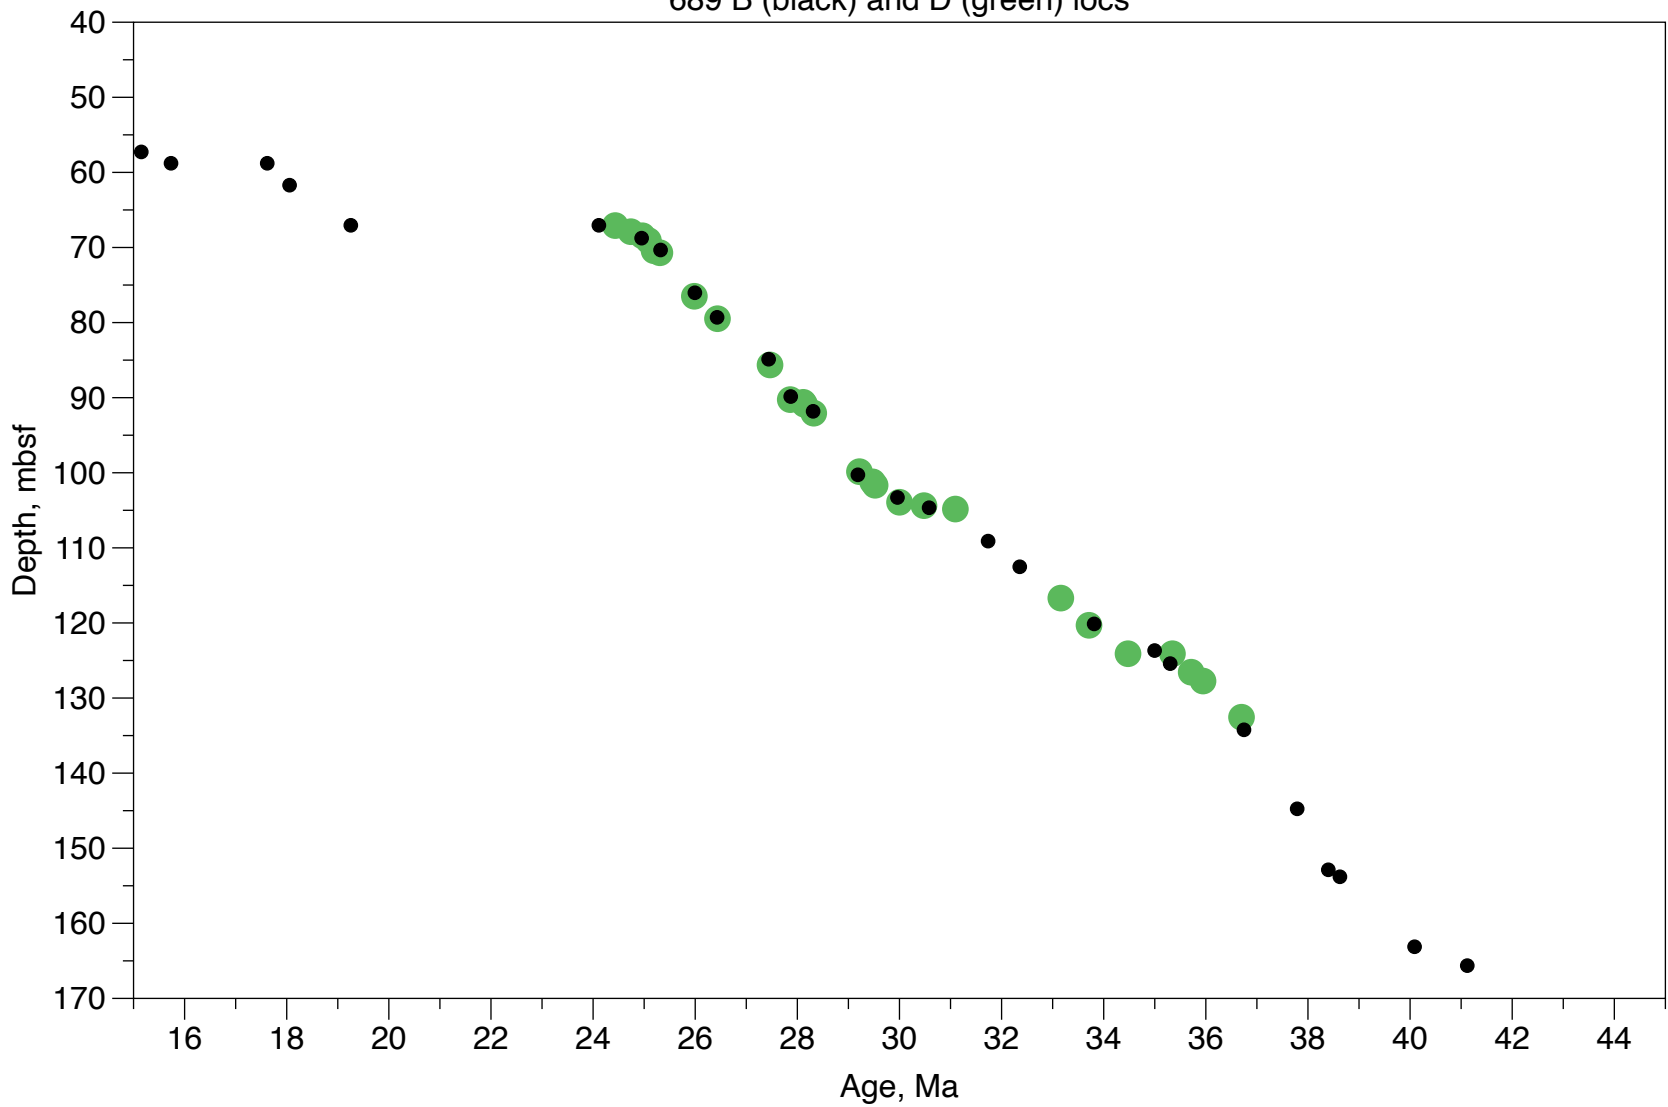

Supplement: Supplementary file 11 [file egusphere-2023-1276-supplement-version3.zip]
